# Supplementary material for: Thermodynamic stabilization of nanostructured alpha-Ni1−xCox(OH)2 for high efficiency batteries and devices
Source: Royal Society of Chemistry journal article supplement (doi:10.1039/c3ra42417k), 2013-01-01
Supplement: c3ra42417k.pdf [file c3ra42417k.pdf]

# Thermodynamic Stabilization of Nanostructured $\alpha\text{-Ni}_{1-x}\text{Co}_x(\text{OH})_2$ for High Efficiency Batteries and Devices

Paulo Roberto Martins,<sup>a</sup> Sergio Hiroshi Toma,<sup>a</sup> Marcelo Nakamura,<sup>a</sup> Henrique Eisi Toma<sup>a</sup> and Koiti Araki<sup>\*,a</sup>

5

## SUPPORTING INFORMATION

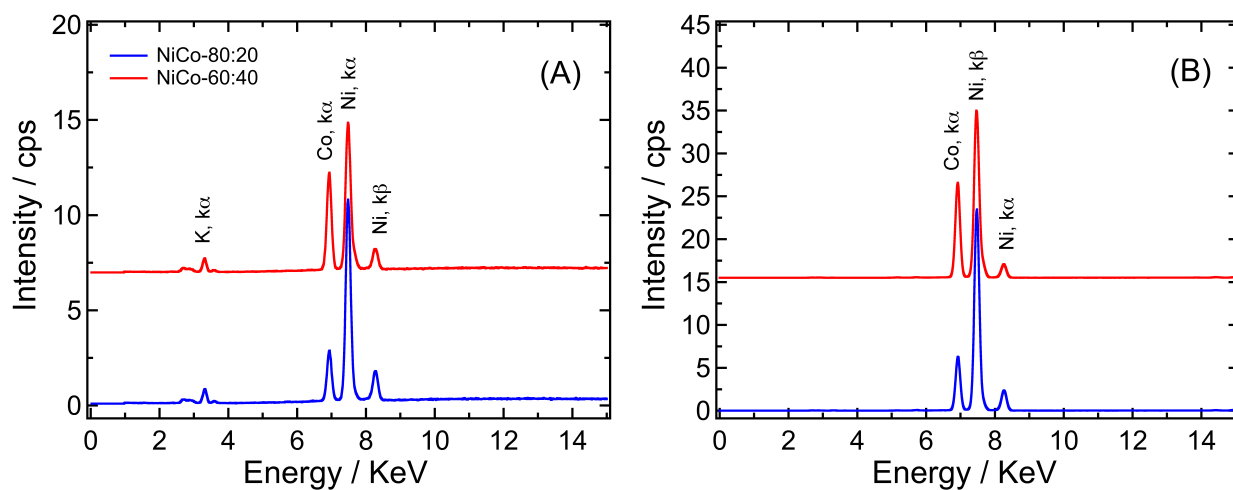

10

Figure S1: EDX analyses of  $\alpha\text{-Ni}_{1-x}\text{Co}_x(\text{OH})_2$  suspension in glycerin and as powder samples.

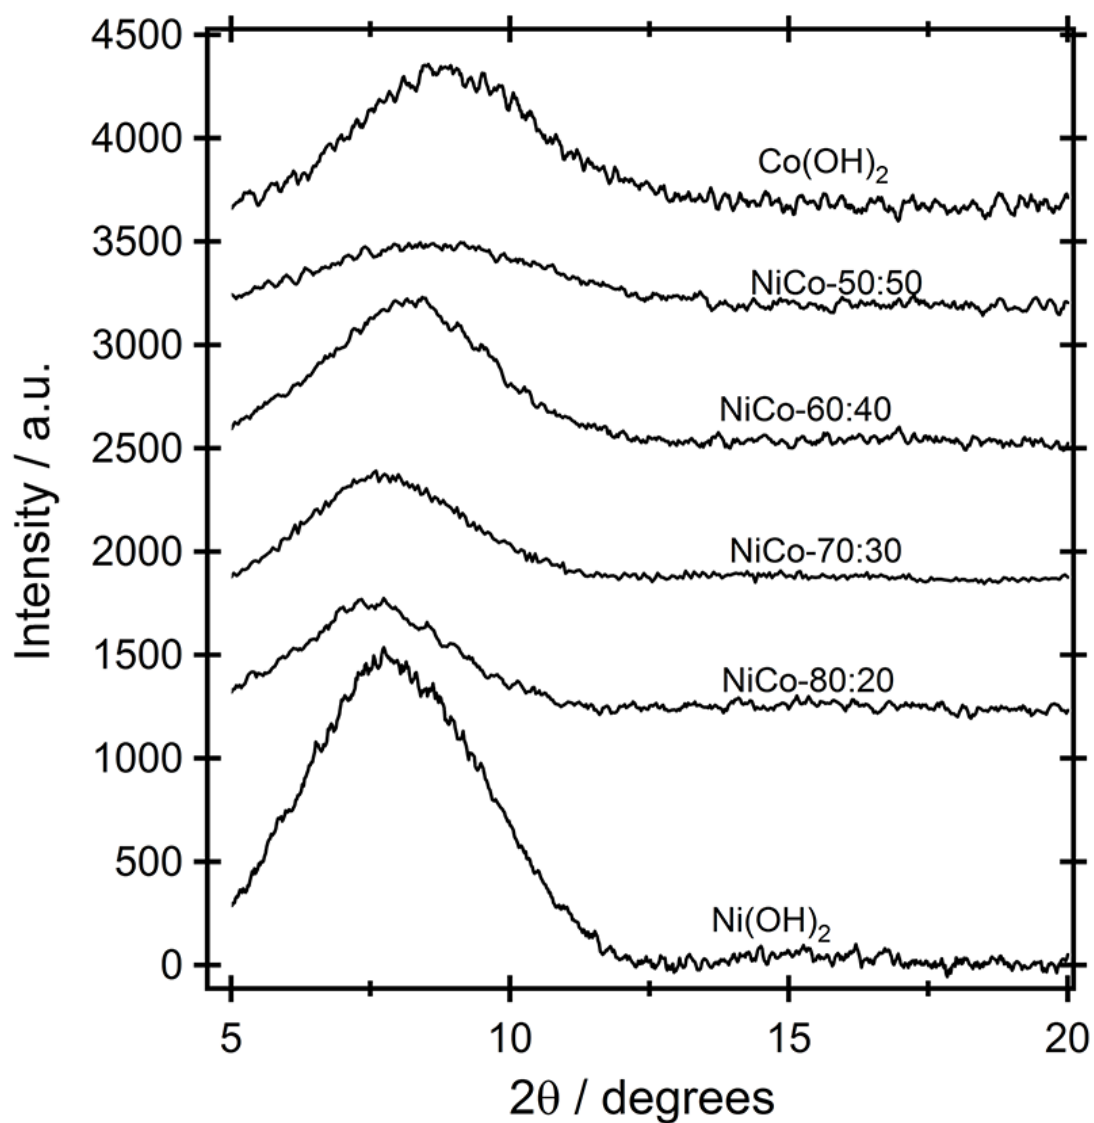

Figure S2: XRD patterns of Ni(OH)<sub>2</sub>, Co(OH)<sub>2</sub> and Ni<sub>1-x</sub>Co<sub>x</sub>(OH)<sub>2</sub> in the 5 to 20 degrees (2θ) showing the 003 peak of typical alpha phase materials.

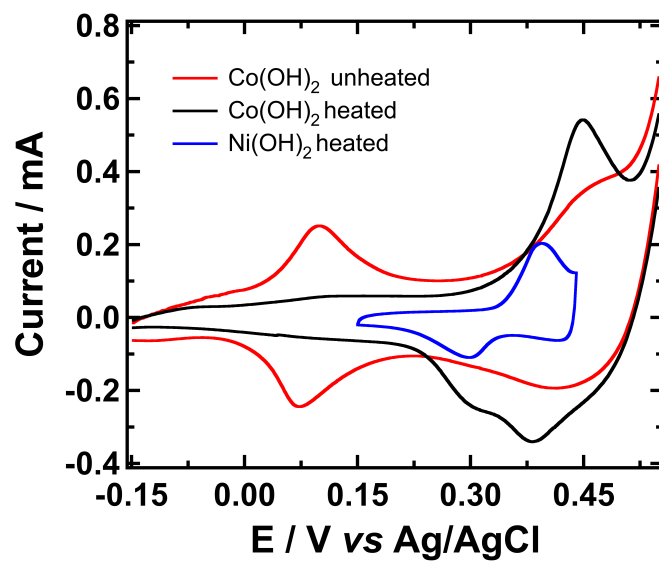

Figure S3: Cyclic voltammograms of FTO electrodes modified with  $\alpha\text{-Co(OH)}_2$  before and after heat treatment at 240 °C, and modified with heated  $\alpha\text{-Ni(OH)}_2$  in 1.0 mol.L<sup>-1</sup> solution.

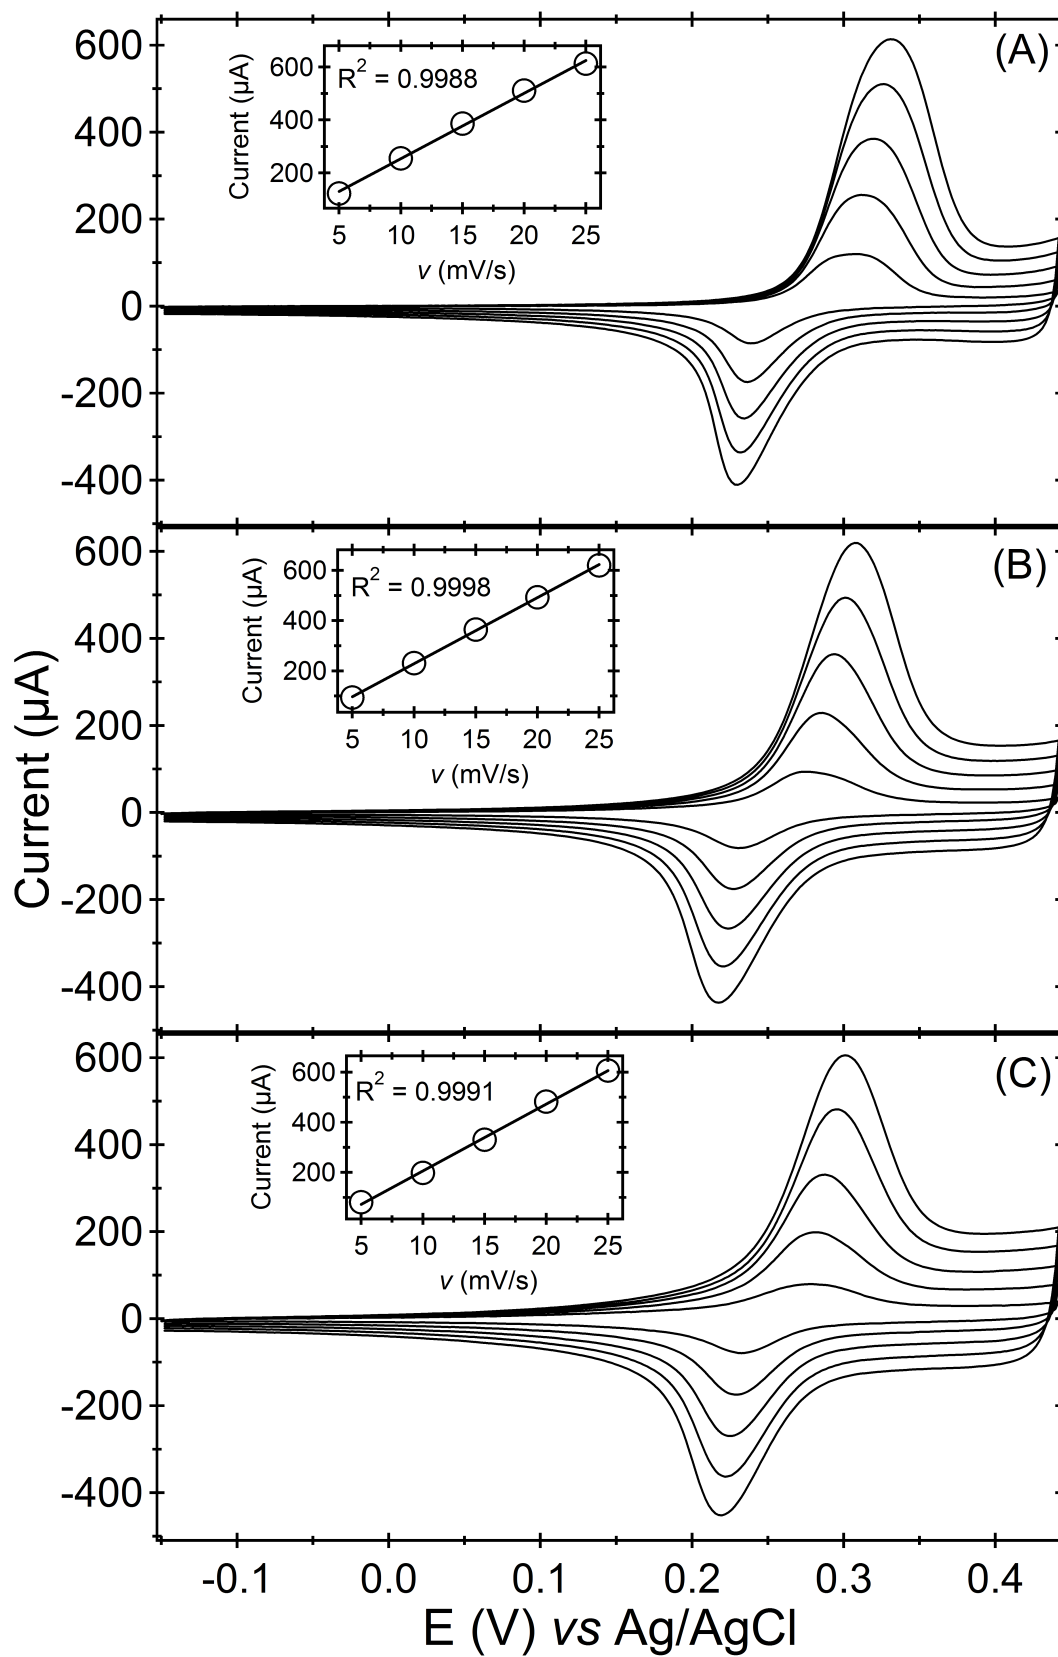

Figure S4: Cyclic voltammograms of FTO electrodes modified with (a) NiCo-80:20, (b) NiCo-60:40 and (c) NiCo-50:50 at different scan rates (5, 10, 15, 20 and 25  $\text{mV s}^{-1}$ ). Inset: Plots of current vs scan rate.
